# Supplementary material
Source: Springer Nature journal article supplement (https://www.springermedizin.de/resource/supplementary/12890_2013_418_MOESM4_ESM.pdf/9505170)

**A**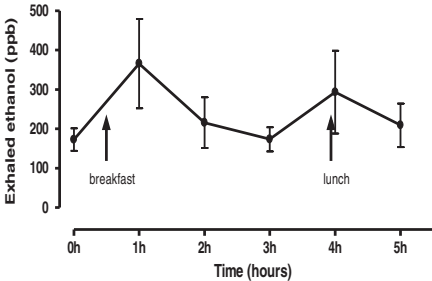**B**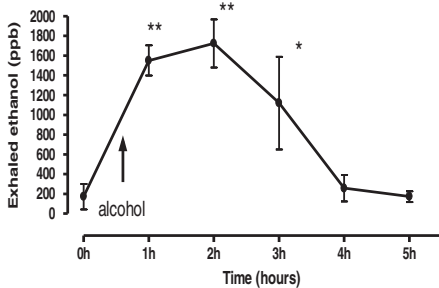

Supplement: MOESM4 [file 9505170]
